# Supplementary material for: Metabolic and Transcriptomic Signatures of the Acute Psychological Stress Response in the Mouse Brain
Source: MDPI journal article supplement (doi:10.3390/metabo13030453), 2023-03-20
Supplement: s1 [file s1]

**Table S1.** List of 60 DEGs in water avoidance stress (WAS) versus the control.

| Gene Symbol   | Description                                                             | Fold Change<br>(Water Stress/Control) | <i>p</i> Value | Regulation |
|---------------|-------------------------------------------------------------------------|---------------------------------------|----------------|------------|
| Satb2         | special AT-rich sequence binding protein 2                              | 1.621                                 | 0.014          | Up         |
| Pecr          | peroxisomal trans-2-enoyl-CoA reductase                                 | 1.503                                 | 0.020          | Up         |
| Dnajb3        | DnaJ heat shock protein family (Hsp40) member B3                        | 0.619                                 | 0.015          | Down       |
| Serpinb8      | serine (or cysteine) peptidase inhibitor, clade B, member 8             | 1.824                                 | 0.024          | Up         |
| C130074G19Rik | RIKEN cDNA C130074G19 gene                                              | 1.638                                 | 0.038          | Up         |
| Gucd1         | guanylyl cyclase domain containing 1                                    | 1.540                                 | 0.001          | Up         |
| Smtn          | smoothelin                                                              | 0.640                                 | 0.043          | Down       |
| Emid1         | EMI domain containing 1                                                 | 1.789                                 | 0.007          | Up         |
| Doc2b         | double C2, beta                                                         | 0.658                                 | 0.007          | Down       |
| Grb7          | growth factor receptor bound protein 7                                  | 0.627                                 | 0.043          | Down       |
| Hist1h1e      | histone cluster 1, H1e                                                  | 1.895                                 | 0.004          | Up         |
| A830009L08Rik | RIKEN cDNA A830009L08 gene                                              | 1.957                                 | 0.002          | Up         |
| Smim4         | small integral membrane protein 4                                       | 0.666                                 | 0.001          | Down       |
| Atad2         | ATPase family, AAA domain containing 2                                  | 1.585                                 | 0.001          | Up         |
| Igfbp6        | insulin-like growth factor binding protein 6                            | 1.682                                 | 0.019          | Up         |
| Serpind1      | serine (or cysteine) peptidase inhibitor, clade D, member 1             | 0.638                                 | 0.007          | Down       |
| Zfp960        | zinc finger protein 960                                                 | 1.581                                 | 0.008          | Up         |
| Noxo1         | NADPH oxidase organizer 1                                               | 0.597                                 | 0.047          | Down       |
| Epb4.1l4a     | erythrocyte membrane protein band 4.1 like 4a                           | 0.529                                 | 0.004          | Down       |
| Blnk          | B cell linker                                                           | 1.682                                 | 0.021          | Up         |
| Kcnh7         | potassium voltage-gated channel, subfamily H (eag-related), member 7    | 1.510                                 | 0.047          | Up         |
| Adam33        | a disintegrin and metallopeptidase domain 33                            | 1.604                                 | 0.032          | Up         |
| Ovol2         | ovo like zinc finger 2                                                  | 1.604                                 | 0.043          | Up         |
| Pxmp4         | peroxisomal membrane protein 4                                          | 0.647                                 | 0.000          | Down       |
| Nkain4        | Na <sup>+</sup> /K <sup>+</sup> transporting ATPase interacting 4       | 0.621                                 | 0.002          | Down       |
| P2ry1         | purinergic receptor P2Y, G-protein coupled 1                            | 0.573                                 | 0.038          | Down       |
| Paqr6         | progesterone and adipoQ receptor family member VI                       | 0.637                                 | 0.005          | Down       |
| Slc22a15      | solute carrier family 22 (organic anion /cation transporter), member 15 | 0.631                                 | 0.016          | Down       |
| Fam212b       | family with sequence similarity 212, member B                           | 1.525                                 | 0.010          | Up         |
| Gstm6         | glutathione S-transferase, mu 6                                         | 0.550                                 | 0.005          | Down       |

|               |                                                                    |       |       |      |
|---------------|--------------------------------------------------------------------|-------|-------|------|
| Arsj          | arylsulfatase J                                                    | 0.563 | 0.030 | Down |
| Tacr3         | tachykinin receptor 3                                              | 0.532 | 0.050 | Down |
| Adamtsl1      | ADAMTS-like 1                                                      | 0.651 | 0.030 | Down |
| Ttc39aos1     | Ttc39a opposite strand RNA 1                                       | 0.562 | 0.019 | Down |
| Mycl          | v-myc avian myelocytomatosis viral oncogene lung carcinoma derived | 0.644 | 0.049 | Down |
| Zbtb8a        | zinc finger and BTB domain containing 8a                           | 1.956 | 0.017 | Up   |
| Kit           | kit oncogene                                                       | 0.648 | 0.036 | Down |
| Arhgap24      | Rho GTPase activating protein 24                                   | 0.579 | 0.037 | Down |
| Cabp1         | calcium binding protein 1                                          | 1.522 | 0.015 | Up   |
| Nos1          | nitric oxide synthase 1, neuronal                                  | 0.656 | 0.021 | Down |
| Ncf1          | neutrophil cytosolic factor 1                                      | 1.527 | 0.045 | Up   |
| Arhgap25      | Rho GTPase activating protein 25                                   | 1.568 | 0.002 | Up   |
| Fancd2        | Fanconi anemia, complementation group D2                           | 1.598 | 0.021 | Up   |
| Zfand4        | zinc finger, AN1-type domain 4                                     | 0.638 | 0.025 | Down |
| C1ra          | complement component 1, r subcomponent A                           | 1.787 | 0.026 | Up   |
| Npas1         | neuronal PAS domain protein 1                                      | 0.547 | 0.038 | Down |
| Zfp658        | zinc finger protein 658                                            | 0.662 | 0.002 | Down |
| Dkk1l         | dickkopf-like 1                                                    | 1.533 | 0.030 | Up   |
| Cemip         | cell migration inducing protein, hyaluronan binding                | 1.816 | 0.028 | Up   |
| B4galnt4      | beta-1,4-N-acetyl-galactosaminyl transferase 4                     | 0.658 | 0.023 | Down |
| Gm10635       | predicted gene 10635                                               | 2.413 | 0.022 | Up   |
| Zfp105        | zinc finger protein 105                                            | 0.537 | 0.014 | Down |
| Jade3         | jade family PHD finger 3                                           | 0.585 | 0.049 | Down |
| Igsf1         | immunoglobulin superfamily, member 1                               | 0.343 | 0.039 | Down |
| Ccdc160       | coiled-coil domain containing 160                                  | 0.560 | 0.010 | Down |
| Heph          | hephaestin                                                         | 0.551 | 0.022 | Down |
| Mum1l1        | melanoma associated antigen (mutated) 1-like 1                     | 0.615 | 0.001 | Down |
| Usp51         | ubiquitin specific protease 51                                     | 0.576 | 0.045 | Down |
| 2210013O21Rik | RIKEN cDNA 2210013O21 gene                                         | 0.666 | 0.029 | Down |
| Adgrg2        | adhesion G protein-coupled receptor G2                             | 0.543 | 0.003 | Down |

Abbreviations: DEG, differentially expressed gene.

**Table S2.** List of significantly altered brain metabolites in acute WAS versus the control.

| Super Pathway | Sub Pathway                                | Biochemical Name                            | Fold Change | p Value | Platform    |
|---------------|--------------------------------------------|---------------------------------------------|-------------|---------|-------------|
| Amino Acid    | Lysine Metabolism                          | 5-aminovalerate                             | 2.16        | 0.0015  | LC/MS pos   |
|               | Phenylalanine and Tyrosine Metabolism      | homovanillate (HVA)                         | 1.17        | 0.0319  | LC/MS neg   |
|               | Leucine, Isoleucine and Valine Metabolism  | leucine                                     | 1.17        | 0.0341  | LC/MS pos   |
|               |                                            | isoleucine                                  | 1.18        | 0.0339  | LC/MS pos   |
|               |                                            | ethylmalonate                               | 1.29        | 0.0136  | LC/MS polar |
|               |                                            | valine                                      | 1.18        | 0.0286  | LC/MS pos   |
| Carbohydrate  | Glutathione Metabolism                     | 4-hydroxy-nonenal-glutathione               | 1.21        | 0.0105  | LC/MS neg   |
|               | Pentose Phosphate Pathway                  | sedoheptulose-7-phosphate                   | 1.19        | 0.0323  | LC/MS neg   |
|               | Fructose, Mannose and Galactose Metabolism | mannose                                     | 2.94        | 0.0297  | LC/MS polar |
| Lipid         | Long Chain Fatty Acid                      | palmitate (16:0)                            | 1.17        | 0.0165  | LC/MS neg   |
|               |                                            | palmitoleate (16:1n7)                       | 1.25        | 0.0409  | LC/MS neg   |
|               |                                            | margarate (17:0)                            | 1.19        | 0.0132  | LC/MS neg   |
|               |                                            | stearate (18:0)                             | 1.19        | 0.0369  | LC/MS neg   |
|               |                                            | 10-nonadecenoate (19:1n9)                   | 1.32        | 0.0425  | LC/MS neg   |
|               |                                            | eicosenoate (20:1n9 or 11)                  | 1.27        | 0.0491  | LC/MS neg   |
|               | Polyunsaturated Fatty Acid (n3 and n6)     | eicosapentaenoate (EPA; 20:5n3)             | 1.31        | 0.0252  | LC/MS neg   |
|               |                                            | docosapentaenoate (n3 DPA; 22:5n3)          | 1.38        | 0.0347  | LC/MS neg   |
|               |                                            | linolenate [alpha or gamma; (18:3n3 or 6)]  | 1.49        | 0.0449  | LC/MS neg   |
|               |                                            | dihomo-linolenate (20:3n3 or n6)            | 1.37        | 0.0021  | LC/MS neg   |
|               |                                            | adrenate (22:4n6)                           | 1.49        | 0.0246  | LC/MS neg   |
|               |                                            | docosapentaenoate (n6 DPA; 22:5n6)          | 1.29        | 0.0238  | LC/MS neg   |
|               |                                            | dihomo-linoleate (20:2n6)                   | 1.31        | 0.0328  | LC/MS neg   |
|               |                                            | mead acid (20:3n9)                          | 1.74        | 0.0063  | LC/MS neg   |
|               | Eicosanoid                                 | prostaglandin F2alpha                       | 1.29        | 0.0014  | LC/MS neg   |
|               |                                            | 15-HETE                                     | 1.29        | 0.011   | LC/MS neg   |
|               | Endocannabinoid                            | palmitoyl ethanolamide                      | 1.49        | 0.0196  | LC/MS neg   |
|               |                                            | N-palmitoyltaurine                          | 1.65        | 0.0333  | LC/MS neg   |
|               | Phospholipid Metabolism                    | choline phosphate                           | 1.06        | 0.0407  | LC/MS pos   |
|               | Lysolipid                                  | 1-palmitoleoylglycerophosphocholine (16:1)* | 0.68        | 0.0215  | LC/MS pos   |
|               |                                            | 1-oleoylglycerophosphoethanolamine          | 1.08        | 0.01    | LC/MS polar |
|               |                                            | 1-arachidonoylglycerophosphoethanolamine*   | 1.23        | 0.0485  | LC/MS neg   |
|               |                                            | 1-palmitoylglycerophosphoinositol*          | 1.63        | 0.0013  | LC/MS neg   |
|               |                                            | 1-stearoylglycerophosphoinositol            | 1.55        | 0.0014  | LC/MS neg   |
|               |                                            | 1-arachidonoylglycerophosphoinositol*       | 1.49        | 0.0136  | LC/MS neg   |

|             |                                            |                                       |      |        |           |
|-------------|--------------------------------------------|---------------------------------------|------|--------|-----------|
|             |                                            | 1-stearoylglycerophosphoserine*       | 1.55 | 0.0008 | LC/MS neg |
|             |                                            | 1-oleoylglycerophosphoserine          | 1.69 | 0.0005 | LC/MS neg |
|             |                                            | 1-palmitoylglycerophosphoglycerol*    | 1.66 | 0.0154 | LC/MS neg |
|             |                                            | 1-palmitoylglycerophosphoserine*      | 2.99 | 0.0016 | LC/MS neg |
|             |                                            | 1-oleoylglycerophosphoglycerol*       | 1.75 | 0.0193 | LC/MS neg |
|             | Steroid                                    | corticosterone                        | 1.3  | 0.0332 | LC/MS pos |
| Nucleotide  | Purine Metabolism, Guanine containing      | N2,N2-dimethylguanosine               | 1.58 | 0.0297 | LC/MS pos |
|             | Pyrimidine Metabolism, Cytidine containing | cytidine                              | 1.17 | 0.0411 | LC/MS pos |
| Xenobiotics | Food Component/Plant                       | methyl glucopyranoside (alpha + beta) | 1.5  | 0.047  | LC/MS pos |

**Table S3.** Summary of joint pathway integration analysis of transcriptomic and metabolomic data with Metaboanalyst 5.0.

| Pathway Name                                           | Total | Expected | Hits | Raw <i>p</i> | −log <sub>10</sub> ( <i>p</i> Value) | Holm Adjust | FDR       | Impact   |
|--------------------------------------------------------|-------|----------|------|--------------|--------------------------------------|-------------|-----------|----------|
| Biosynthesis of unsaturated fatty acids                | 47    | 0.39413  | 5    | 2.97E-05     | 4.5266                               | 0.0024982   | 0.0024982 | 0.1087   |
| Valine, leucine and isoleucine biosynthesis            | 12    | 0.10063  | 3    | 1.06E-04     | 3.9754                               | 0.0087834   | 0.0044446 | 0.36364  |
| Aminoacyl-tRNA biosynthesis                            | 74    | 0.62055  | 3    | 0.022368     | 1.6504                               | 1           | 0.59028   | 0.041096 |
| Glycerophospholipid metabolism                         | 86    | 0.72117  | 3    | 0.03312      | 1.4799                               | 1           | 0.59028   | 0.17647  |
| Valine, leucine and isoleucine degradation             | 88    | 0.73795  | 3    | 0.035136     | 1.4542                               | 1           | 0.59028   | 0.08046  |
| Arachidonic acid metabolism                            | 79    | 0.66247  | 2    | 0.14032      | 0.85287                              | 1           | 1         | 0.051282 |
| alpha-Linolenic acid metabolism                        | 22    | 0.18449  | 1    | 0.1698       | 0.77006                              | 1           | 1         | 0.14286  |
| Arginine biosynthesis                                  | 27    | 0.22642  | 1    | 0.20437      | 0.68958                              | 1           | 1         | 0.15385  |
| Glycosylphosphatidylinositol (GPI)-anchor biosynthesis | 31    | 0.25996  | 1    | 0.23104      | 0.63631                              | 1           | 1         | 0.13333  |
| Pantothenate and CoA biosynthesis                      | 34    | 0.28512  | 1    | 0.25048      | 0.60122                              | 1           | 1         | 0.060606 |
| Drug metabolism - cytochrome P450                      | 39    | 0.32704  | 1    | 0.28185      | 0.54998                              | 1           | 1         | 0.052632 |
| Pentose phosphate pathway                              | 47    | 0.39413  | 1    | 0.32946      | 0.48219                              | 1           | 1         | 0.086957 |
| Porphyrin and chlorophyll metabolism                   | 53    | 0.44444  | 1    | 0.36319      | 0.43987                              | 1           | 1         | 0.038462 |
| Glutathione metabolism                                 | 56    | 0.4696   | 1    | 0.37944      | 0.42086                              | 1           | 1         | 0.054545 |
| Drug metabolism - other enzymes                        | 69    | 0.57862  | 1    | 0.44542      | 0.35123                              | 1           | 1         | 0.029412 |
| Fatty acid elongation                                  | 75    | 0.62893  | 1    | 0.47357      | 0.32462                              | 1           | 1         | 0.027027 |
| Arginine and proline metabolism                        | 78    | 0.65409  | 1    | 0.48713      | 0.31236                              | 1           | 1         | 0.051948 |
| Tyrosine metabolism                                    | 88    | 0.73795  | 1    | 0.52998      | 0.27574                              | 1           | 1         | 0.022989 |
| Pyrimidine metabolism                                  | 99    | 0.83019  | 1    | 0.57317      | 0.24171                              | 1           | 1         | 0.030612 |
| Fatty acid degradation                                 | 102   | 0.85535  | 1    | 0.58428      | 0.23338                              | 1           | 1         | 0.019802 |
| Metabolism of xenobiotics by cytochrome P450           | 117   | 0.98113  | 1    | 0.63583      | 0.19666                              | 1           | 1         | 0.22414  |
| Fatty acid biosynthesis                                | 129   | 1.0818   | 1    | 0.67264      | 0.17222                              | 1           | 1         | 0.015625 |
| Steroid hormone biosynthesis                           | 175   | 1.4675   | 1    | 0.78357      | 0.10592                              | 1           | 1         | 0.028736 |
